# Supplementary material
Source: publisher site journal article supplement (https://www.spandidos-publications.com/4952/downloadSupplementary)
Supplement: Supplementary file 1 [file downloadSupplementary]

## Sheet: datamap
Table SI. Expression value of top five most up- and downregulated differentially expressed genes.
Gene	AR	AR	AR	AR	AR	AR	AR	AR	AR	AR	AR	AR	AR	AR	AR	AR	AR	AR	AR	AR	AR	AR	AR	AR	AR	AR	AR	AR	AR	AR	AR	AR	non-AR	non-AR	non-AR	non-AR	non-AR	non-AR	non-AR	non-AR
	GSM2710846	GSM2710847	GSM2710848	GSM2710849	GSM2710850	GSM2710851	GSM2710852	GSM2710856	GSM2710857	GSM2710858	GSM2710859	GSM2710860	GSM2710861	GSM2710862	GSM2710863	GSM2710864	GSM2710867	GSM2710868	GSM2710870	GSM2710871	GSM2710872	GSM2710873	GSM2710874	GSM2710876	GSM2710877	GSM2710878	GSM2710879	GSM2710881	GSM2710882	GSM2710883	GSM2710884	GSM2710885	GSM2710853	GSM2710854	GSM2710855	GSM2710865	GSM2710866	GSM2710869	GSM2710875	GSM2710880
RLN1	101.111	4166.15	95.1746	547.462	117.171	538.772	105.701	93.765	102.556	230.747	176.723	99.2375	96.4972	95.7234	1815.79	211.374	98.8564	133.481	119.056	1801.07	100.394	562.213	176.899	468.743	96.3535	5915.34	134.19	5333.14	6476.61	161.357	236.322	257.752	121.513	98.6446	97.1769	97.8265	98.6219	104.688	129.435	103.264
NPY	122.957	13272.2	4806.59	13615.8	133.746	16248	261.216	173.575	12857.3	15332	222.825	14963.8	652.077	6725.28	11884.2	15140.5	10229	15656.4	103.83	190.514	101.26	14681.4	159.547	121	102.127	14510.2	17781.4	322.356	14356.2	12145.8	232.857	149.932	104.672	377.717	100.583	5598.04	372.681	484.331	108.787	150.162
SPON2	1771.89	2531.79	184.049	784.825	189.752	3122.24	2291.31	4197.04	1047.83	124.163	1312.31	1381.68	860.041	102.181	1565.11	5053.08	1087.85	112.877	3971.69	965.756	107.799	1313.28	2382.98	4761.98	531.543	4851.19	3166.19	1970.59	5008.12	336.995	780.294	1964.49	166.357	341.029	106.316	845.871	152.97	197.472	111.197	120.935
TARP	1341.3	2462.11	2814.51	3974.04	6931.53	4394.97	2343.86	5186.27	1574.8	543.717	3422.63	2335.8	3445.33	1495.32	2307.9	2895.74	5747.89	10136.5	1257.96	2284.48	506.797	6933.52	4363.2	3283.97	2931.83	2450.95	7350.26	5497.03	2082.01	774.535	1225.98	2694.72	467.024	229.014	110.401	2365.07	188.371	160.673	107.789	110.199
ORM2	210.582	98.5496	114.249	141.517	1726.55	407.633	121.445	486.44	134.374	242.106	6124.95	2019.28	133.179	1349.24	1140.59	154.021	97.877	105.639	155.258	105.397	103.784	3820.58	239.943	99.9466	98.6291	94.5775	111.182	599.943	101.641	1487.74	104.884	111.392	100.065	96.514	105.901	120.408	99.8762	111.438	99.8741	99.2435
FOXA2	98.8536	101.921	158.124	98.093	112.891	106.078	97.165	102.215	99.5966	109.68	104.122	97.8288	98.3811	99.0147	153.04	197.889	112.155	97.7998	243.423	100.228	189.119	96.3284	107.456	99.9571	98.3309	111.316	97.433	97.3237	98.3677	137.829	96.3698	98.4275	495.987	99.6809	98.7354	100.579	1297.15	98.2679	2981.46	4050.42
CEL	152.57	156.109	131.738	107.296	121.862	295.675	144.591	124.51	124.724	112.386	106.524	120.265	114.912	104.397	175.128	127.899	119.527	115.529	104.062	127.123	110.657	107.998	154.059	174.248	179.563	118.267	122.704	159.225	115.673	100.355	114.537	116.557	105.131	126.758	3885.09	137.407	423.349	113.425	176.125	6601.64
DBH	95.3979	97.5891	291.766	96.9427	97.7827	136.591	95.697	98.6526	96.6699	98.7815	97.0964	97.7791	98.7041	101.138	96.9925	98.4421	95.3481	98.4235	98.6767	99.8264	239.222	101.231	114.942	99.5991	97.4115	100.029	97.2781	96.8431	99.5234	100.046	98.7157	99.6256	98.2205	98.6711	99.1119	99.6997	1695.06	96.2968	8414.8	551.629
RBP1	175.269	118.922	143.726	151.07	116.652	201.265	135.541	117.506	145.989	113.908	188.877	166.01	201.757	142.958	122.888	164.928	140.71	120.211	316.973	274.3	131.059	147.77	169.616	514.216	113.797	149.001	171.464	171.141	150.788	178.321	116.778	218.81	368.69	179.196	330.303	299.738	12637.1	453.866	16373.2	2427.78
TUBB2B	113.447	136.044	164.598	97.431	108.199	123.65	114.776	105.449	173.828	117.779	169.892	109.077	144.881	136.697	400.38	127.691	249.791	986.415	150.722	103.749	256.133	115.454	190.406	149.14	147.42	141.435	122.473	158.691	113.037	132.851	131.772	145.04	184.566	2092.16	121.015	180.632	7023.29	181.786	15245.5	12130.5
AR, androgen receptor.
